# Supplementary material for: TH17 cells promote CNS inflammation by sensing danger signals via Mincle
Source: PubMed Central journal article supplement (PMC9064974; doi:10.1038/s41467-022-30174-1), 2022-05-03
Supplement: 41467_2022_30174_MOESM1_ESM.pdf [file 41467_2022_30174_MOESM1_ESM.pdf]

**Supplementary Information**

**TH17 cells promote CNS inflammation by sensing  
danger signals via Mincle**

Quanri Zhang et al.

Corresponding authors: Xiaoxia Li, Laura E. Nagy

Supplementary Fig1. mRNA expression of CLRs in EAE CD4+ and Th cells

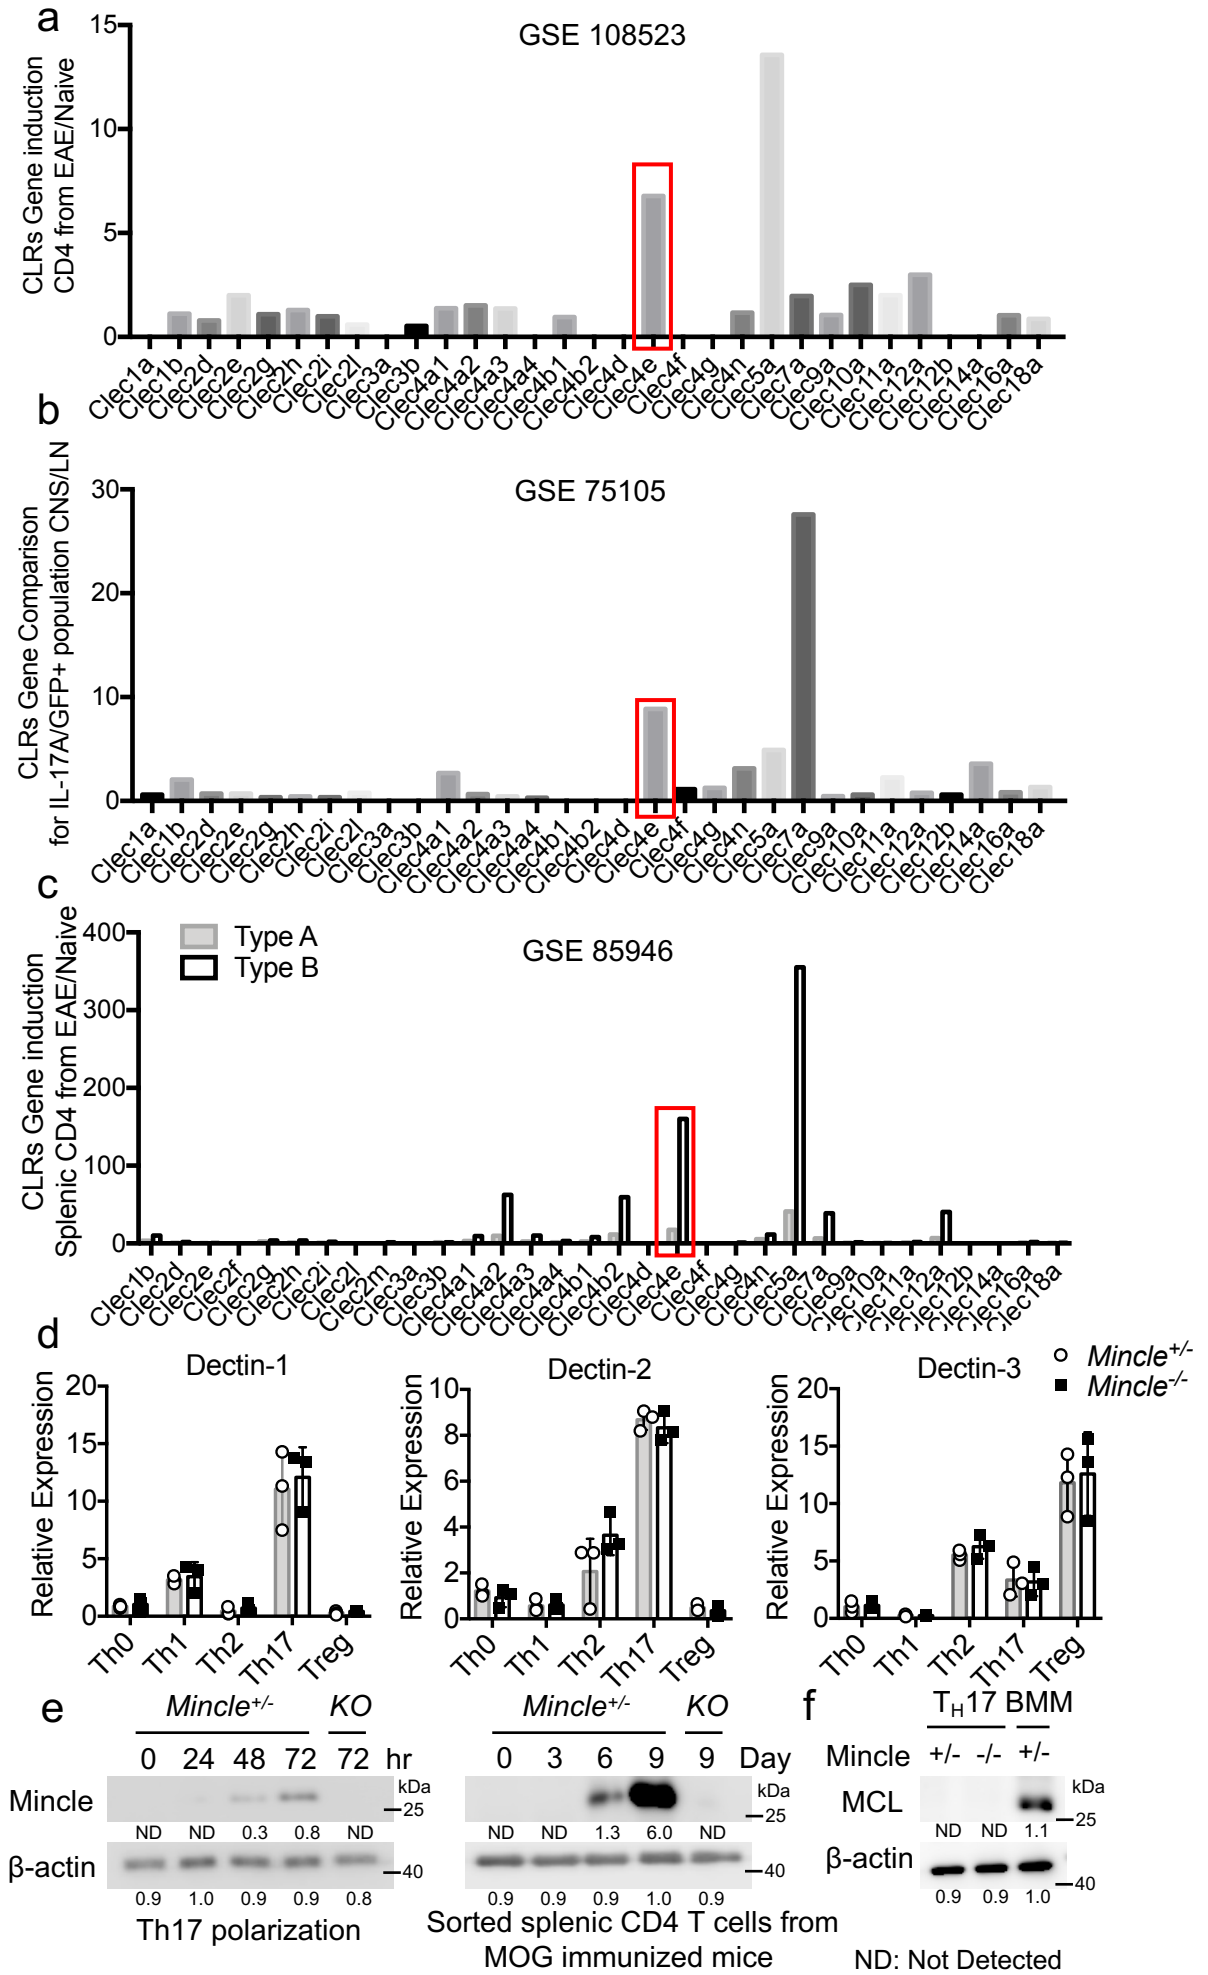

**Supplementary Fig 1.** mRNA expression of CLRs in EAE CD4<sup>+</sup> and T<sub>H</sub> cells **(a-c)** CLRs mRNA induction in CD4 T or IL-17<sup>+</sup> cells were compared in EAE and naïve mice from the public microarray database. **(d)** Expression of Clec7a(Dectin-1), Clec4n(Dectin-2) and Clec4d(Dectin-3) on T<sub>H</sub>0, T<sub>H</sub>1, T<sub>H</sub>2, T<sub>H</sub>17 and Treg cells after 3 days polarization was measured by Real-time PCR, n=3 biological replicates. Relative mRNA expression was compared by setting the lowest expression amount to an arbitrary value of 1. **(e)** Western blot analysis of Mincle expression from Naïve CD4 T cells cultured under T<sub>H</sub>17 polarization conditions (left) and sorted splenic CD4 T cells from MOG (right) at indicated times. **(f)** Western blot analysis of MCL expression in polarized *Mincle*<sup>+/-</sup> and *Mincle*<sup>-/-</sup> T<sub>H</sub>17 cells, bone marrow macrophages were included as a positive control. Data is representative of 3 independent experiments **(e,f)**. Density values measured using Image J for the representative blot shown, ND not detected. Data are represented as mean ± SD.

# Supplementary Fig2. Reduced active EAE in CD4-cre *Mincle*<sup>ff</sup> mice

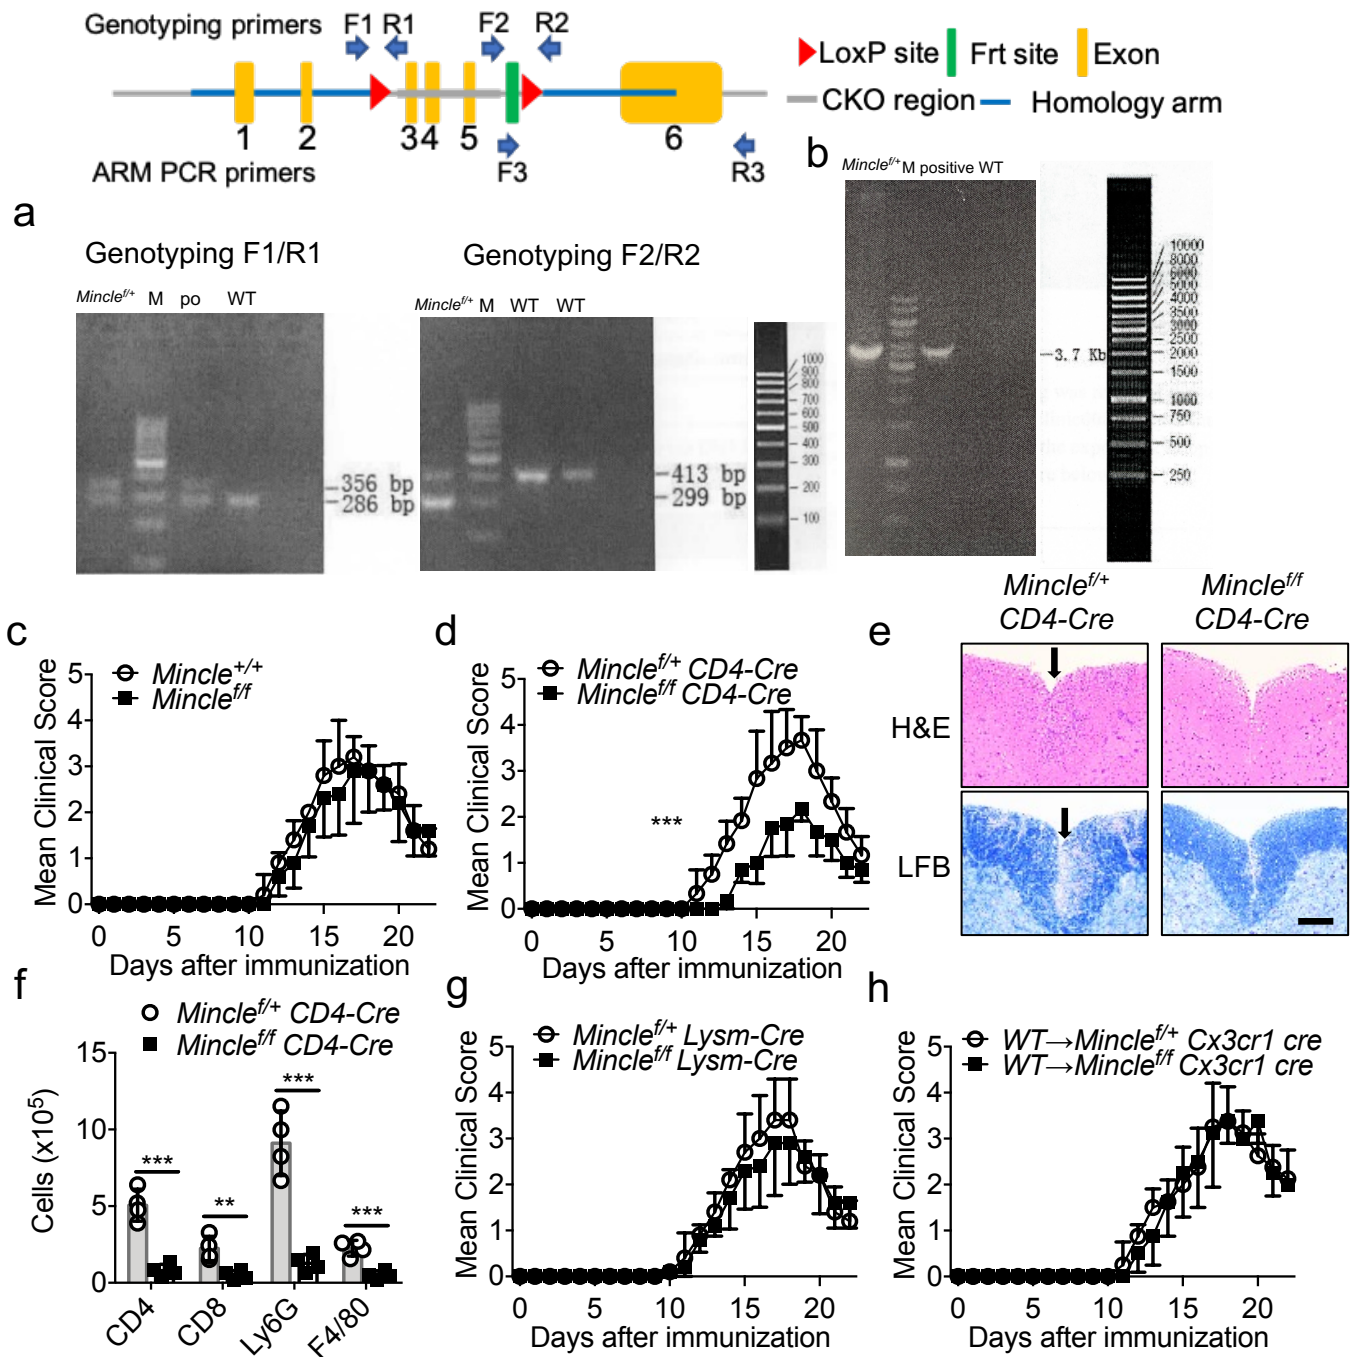

**Supplementary Fig 2.** Reduced EAE in CD4-cre *Mincle<sup>ff</sup>* mice but not in *LysM-Cre Mincle<sup>ff</sup>* or MOG reactive T<sub>H</sub>17 adoptive transferred *Cx3Cr1-cre Mincle<sup>ff</sup>* mice **(a)** Genotyping of *Mincle<sup>ff/+</sup>* mice by PCR followed by agarose gel electrophoresis. Data is representative for at least 3 independent experiments. **(b)** ARMS PCR (Amplification Refractory Mutation System PCR) to screening for the expected 3.7 Kb fragment insertion. Data is representative for 2 independent experiments. **(c)** EAE clinical scores of *Mincle<sup>ff</sup>* and *Mincle<sup>+/+</sup>* mice induced active EAE, n=5 mice. **(d)** EAE clinical scores of *Mincle<sup>ff/+</sup>CD4-Cre* and *Mincle<sup>ff</sup>CD4-Cre* mice induced active EAE, n=5 mice. **(e)** Hematoxylin and eosin (H&E) staining (upper panels) and Luxol fast blue staining (lower panels) of lumbar spinal cords from *Mincle<sup>ff/+</sup>CD4-Cre* and *Mincle<sup>ff</sup>CD4-Cre* EAE mice harvested at the peak of disease. Scale bar, 100µm. Arrows in the upper panel indicate inflammatory cells infiltration, and arrows in the lower panel indicate demyelination area. Representative data are shown for n = 4. **(f)** Absolute numbers of CNS-infiltrating cells were measured in *Mincle<sup>ff/+</sup>CD4-Cre* and *Mincle<sup>ff</sup>CD4-Cre* EAE mice at the peak of disease by flow cytometry with indicated antibodies, n=4 biological replicates. **(g)** EAE clinical scores of *LysM-Cre Mincle<sup>ff</sup>* mice induced active EAE, n=5 mice. **(h)** Mean clinical score of EAE mice induced by adoptive transfer of WT MOG-reactive T<sub>H</sub>17 cells to *Cx3Cr1-cre Mincle<sup>ff</sup>* mice, n = 5 mice. \*P < 0.05, \*\*\*P<0.001 (Two sided student's t test **f**). \*\*P < 0.01 (Two-way ANOVA, **c, d, g and h**). Data are represented as mean ± SD. Exact P values for asterisks (from left to right): d <0.0001 f 0.00026 0.0064 0.00037 0.00099

Supplementary Fig 3. Modulation of T cell survival occurs in the CNS, but not in the periphery

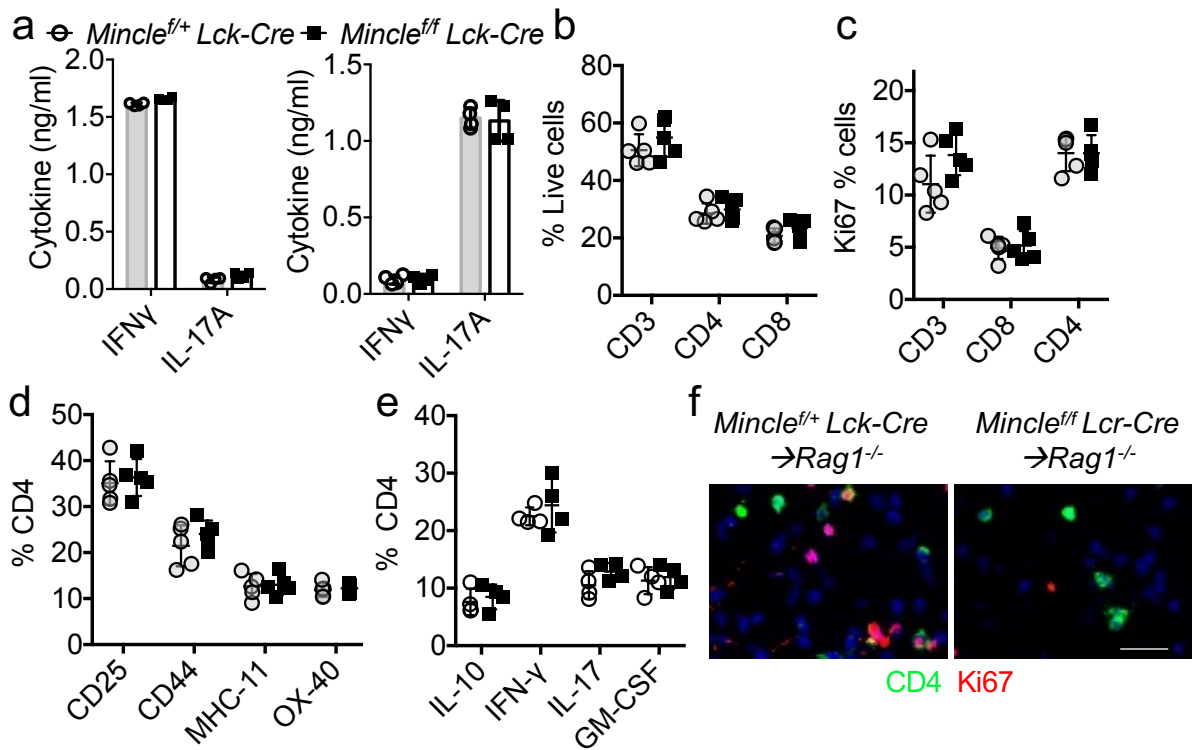

**Supplementary Fig 3.** Modulation of T cell survival occurs in the CNS, but not in the periphery **(a)** ELISA assay for the IL-17A and IFN- $\gamma$  in the supernatant of cells from the draining lymph nodes of mice 10 d after immunization with MOG<sub>35-55</sub> followed by *ex vivo* restimulation in the presence of MOG<sub>35-55</sub> and either IL-12 (**left**) or IL-23 (**right**), n=4 biological replicates. **(b)** Percentage of total CD3, CD4 and CD8 cells in lymph nodes from mice 10 day after immunization with MOG measured by flow cytometry, n=5 biological replicate. **(c-e)** Percentages of Ki67<sup>+</sup>(C), subsets with surface activation markers **(d)** and cytokine producing cells **(e)** in CD4 T cells were measured from mice 10 d after immunization with MOG, n=5 biological replicates. **(f)** Ki-67/CD4 staining of spinal cords from adoptive transfer experiments from day 9 after transfer and percentage of CD4<sup>+</sup> T cells co-staining with Ki-67. Scale bar, 10 $\mu$ m. Red, Ki67<sup>+</sup>. Green, CD4<sup>+</sup>. Representative data are shown for n = 4. (Two sided student's t test for **a-e**) Data are represented as mean  $\pm$  SD.

Supplementary Fig 4. TDB promotes Th17 polarization through Mincle signal

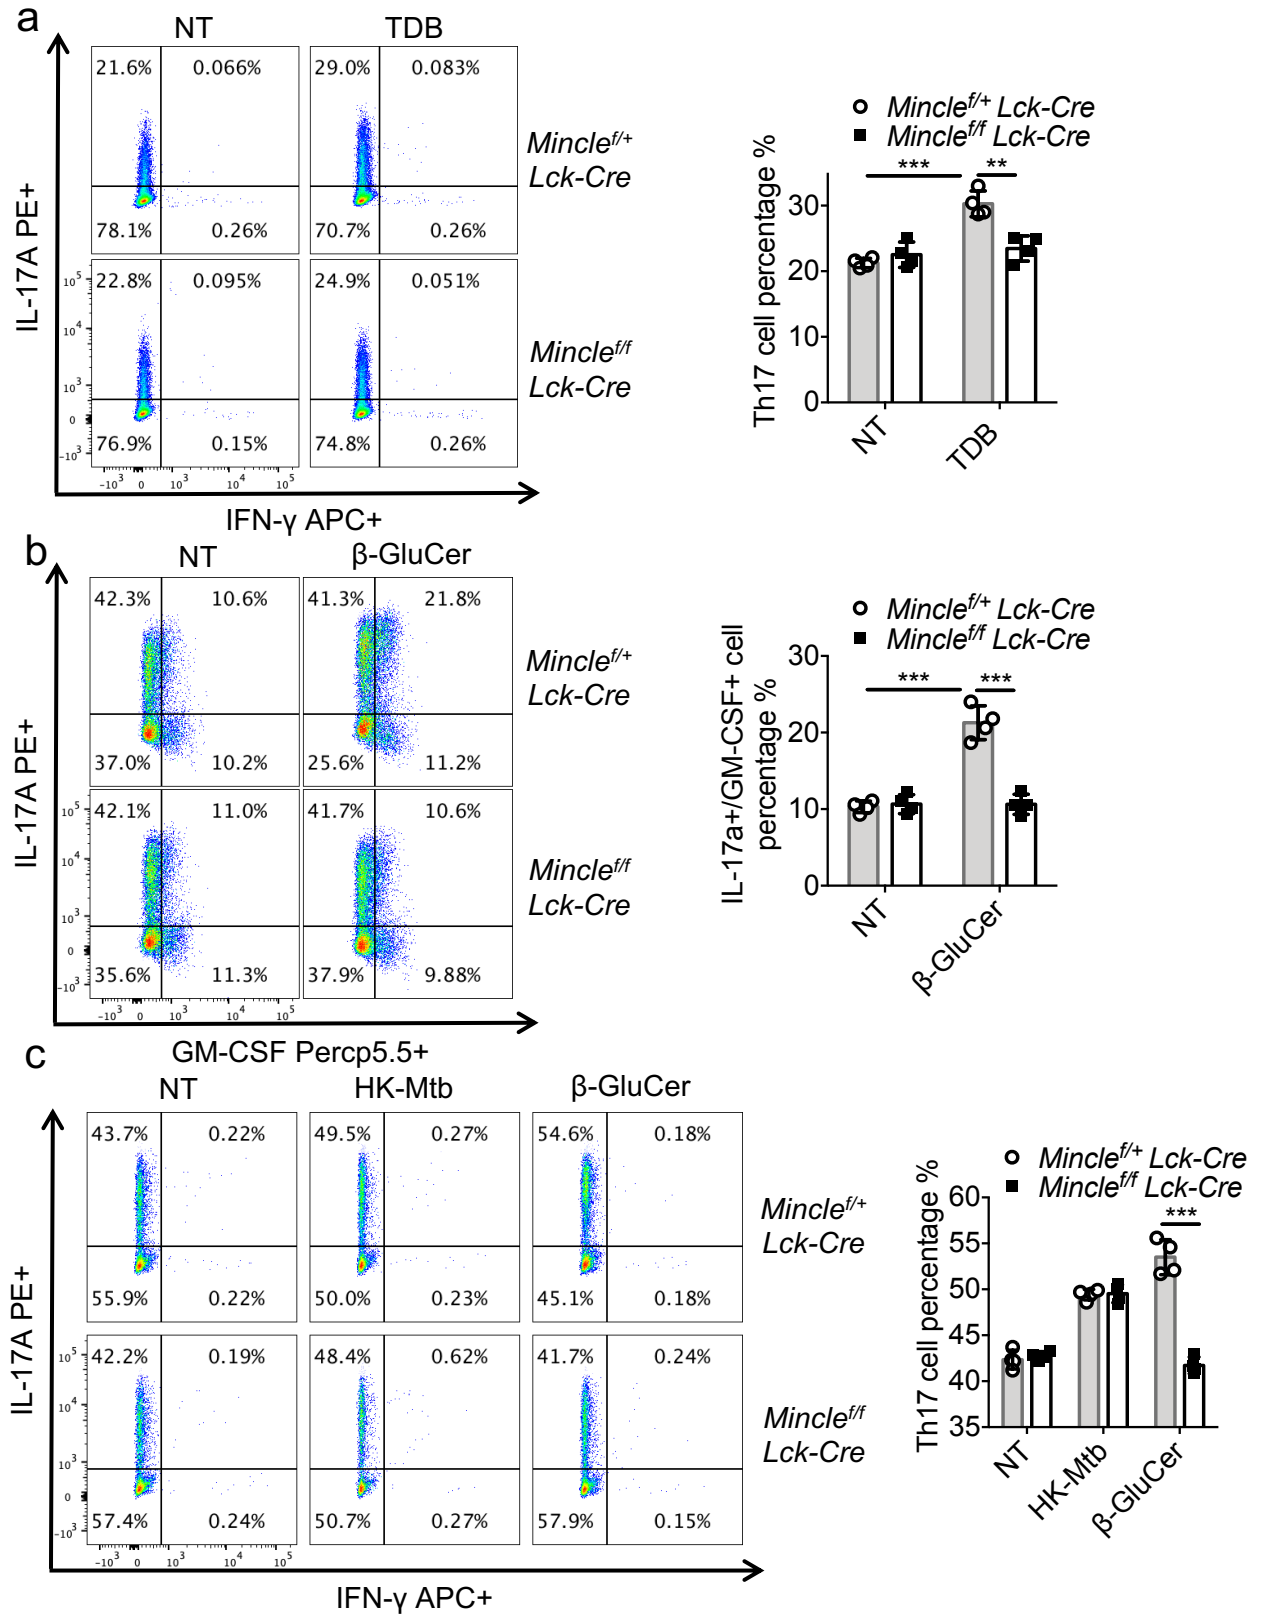

**Supplementary Fig 4.** *Mincle* ligands promotes inflammatory T<sub>H</sub>17 differentiation **(a)** Intracellular cytokine staining of IL17A and IFN $\gamma$  following 3 days T<sub>H</sub>17 differentiation with or without 20ug/ml TDB and analyzed by flow cytometry, n=4 biological replicates. **(b)** Polarized T<sub>H</sub>17 were rest for 2 days with IL-2(2ng/ml) and re-stimulated with CD3/CD28 with or without  $\beta$ -GluCer (5 $\mu$ g/ml) for another 3 days, followed by intracellular cytokine staining for IL17A and GMCSF and analyzed by flow cytometry, n=4 biological replicates. **(c)** Flow cytometric analysis of IL-17A and IFN $\gamma$  following 3 days of T<sub>H</sub>17 polarization with vehicle (PBS), HK-Mtb (10 $\mu$ g/ml) or  $\beta$ -GluCer (5 $\mu$ g/ml), n=4 biological replicates. \*\*p<0.01, \*\*\*p<0.001 (Two sided student's t test). Data are represented as mean  $\pm$  SD. Exact *P* values for asterisks (from left to right): **a** 0.00013 0.0026 **b** 0.00009 0.00017 **c** 0.00003



Supplementary Fig 5

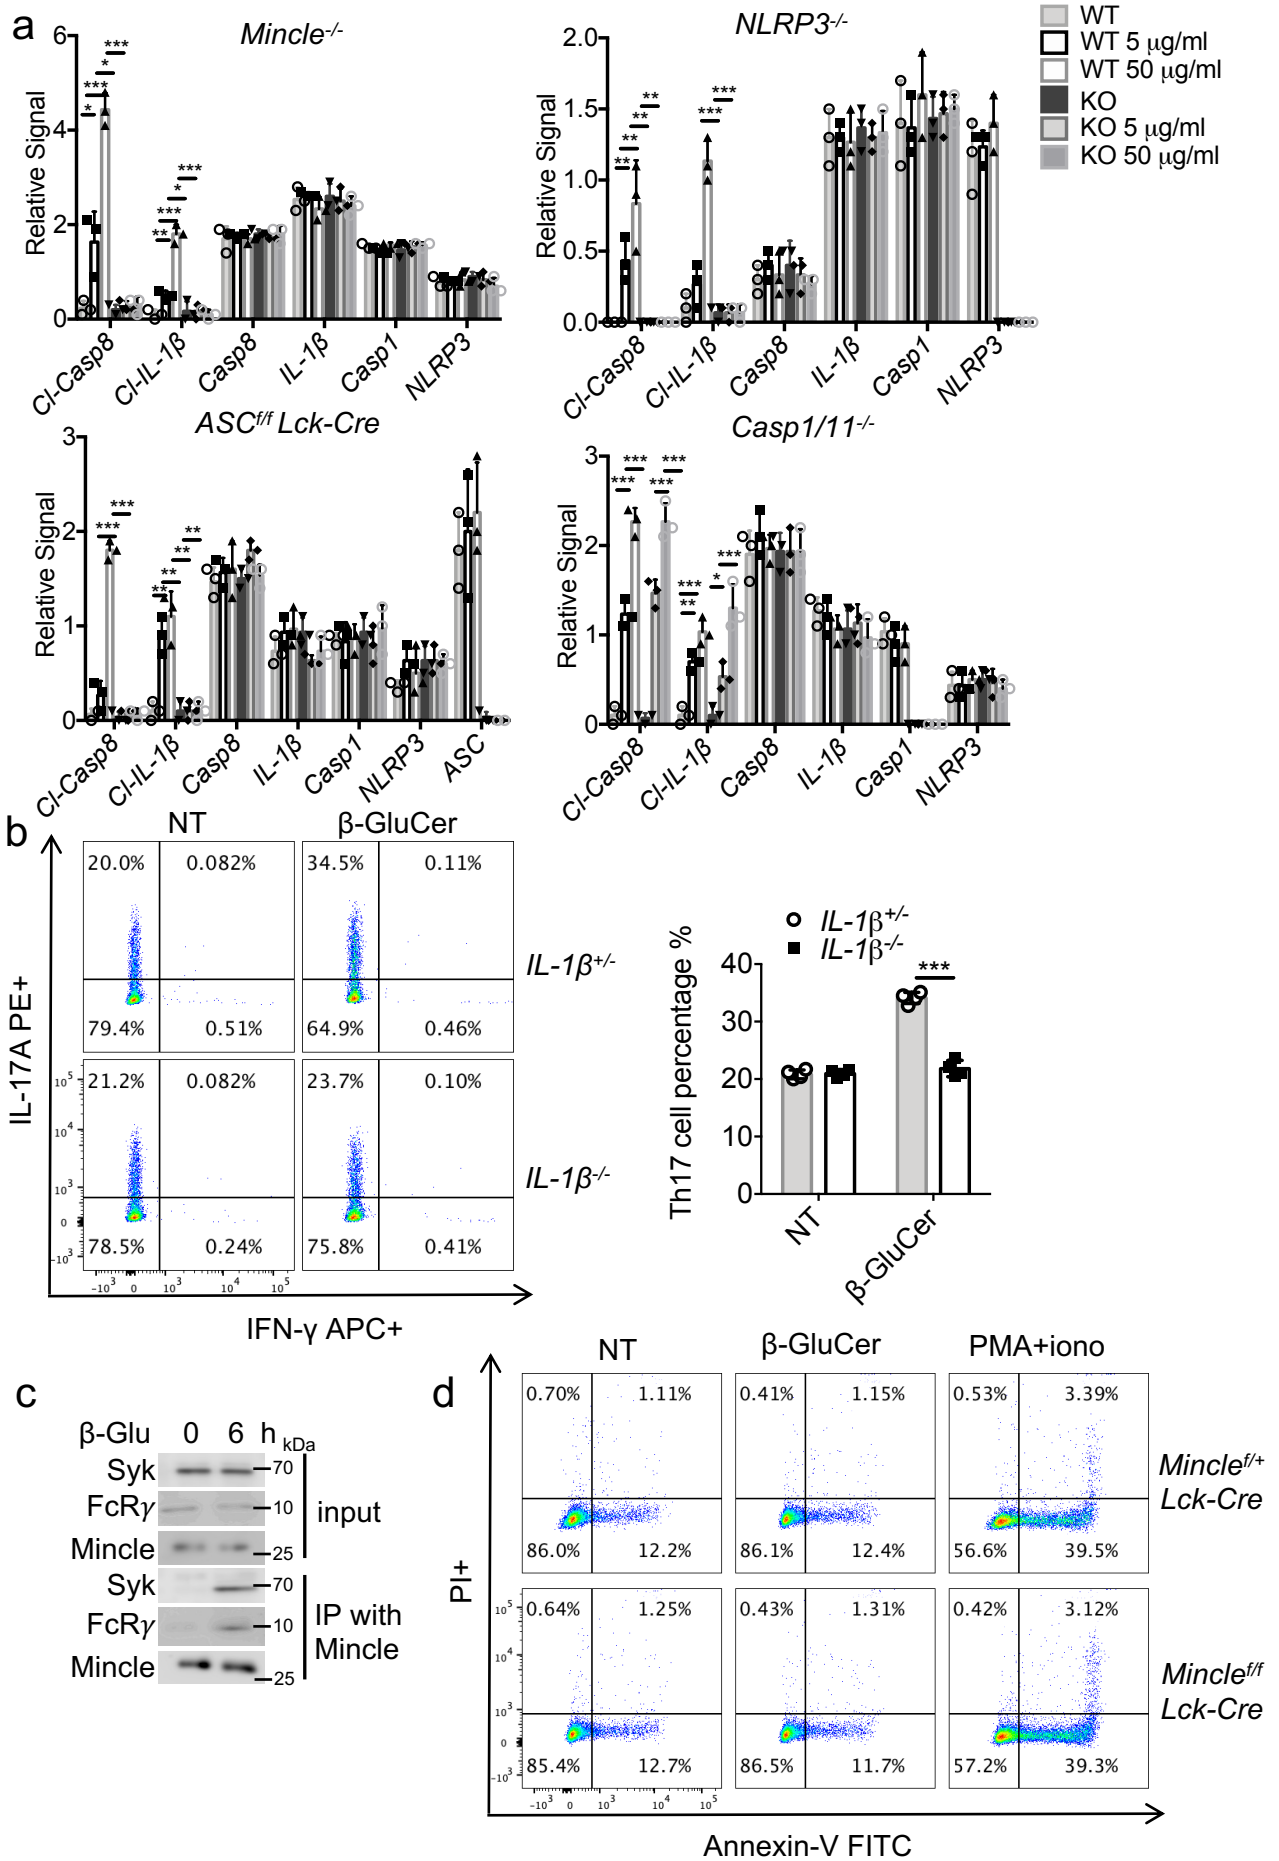

**Supplementary Fig 5.**  $\beta$ -glucosylceramide could activate a *Mincle*-FcR $\gamma$ -Syk-dependent IL-1 $\beta$  production and enhance the T<sub>H</sub>17 proliferation. **(a)** Quantification of western blot band **(Fig 5a-d)** with Image J and the signal were normalized to  $\beta$ -actin, n=3 biological replicates. **(b)** Flow cytometry analysis of polarized *IL-1b*<sup>+/-</sup> and *IL-1b*<sup>-/-</sup> T<sub>H</sub>17 polarized with or without  $\beta$ -glucosylceramide (5 $\mu$ g/ml), n=4 biological replicates. **(c)** Cell lysates from T<sub>H</sub>17 treated with  $\beta$ -glucosylceramide (50 $\mu$ g/ml) were subjected to immunoprecipitation with anti-*Mincle*, followed by western analysis with the indicated antibodies. Data is representative for at least 3 independent experiments. **(d)** Annexin V/Propidium Iodide cell viability assay were performed via flow cytometry on T<sub>H</sub>17 cells polarized with  $\beta$ -glucosylceramide (5 $\mu$ g/ml). Cells treated with PMA and ionomycin for 4 hours were used as a positive control. Data were representative of 3 different individual experiments. \*P < 0.05, \*\*P<0.01, \*\*\*P<0.001 (Two sided student's t test, **a, b**). Data are represented as mean  $\pm$  SD. Exact P values for asterisks (from left to right): **a** 0.0213 0.00005 0.0214 0.00005 0.0080 0.0002 0.0341 0.0002, 0.0080 0.0091 0.0080 0.0091 0.0006 0.0003, 0.00001 0.00001 0.0034 0.0036 0.0034 0.0036, 0.0004 0.00003 0.00012 0.00006 0.0018 0.0009 0.0147 0.0018 **b** <0.0001

Supplementary Fig 6.  $\beta$ -Glucosylceramide or AMP-DNM administration did not affect EAE in *Mincle<sup>ff</sup> CD4-Cre* Mice

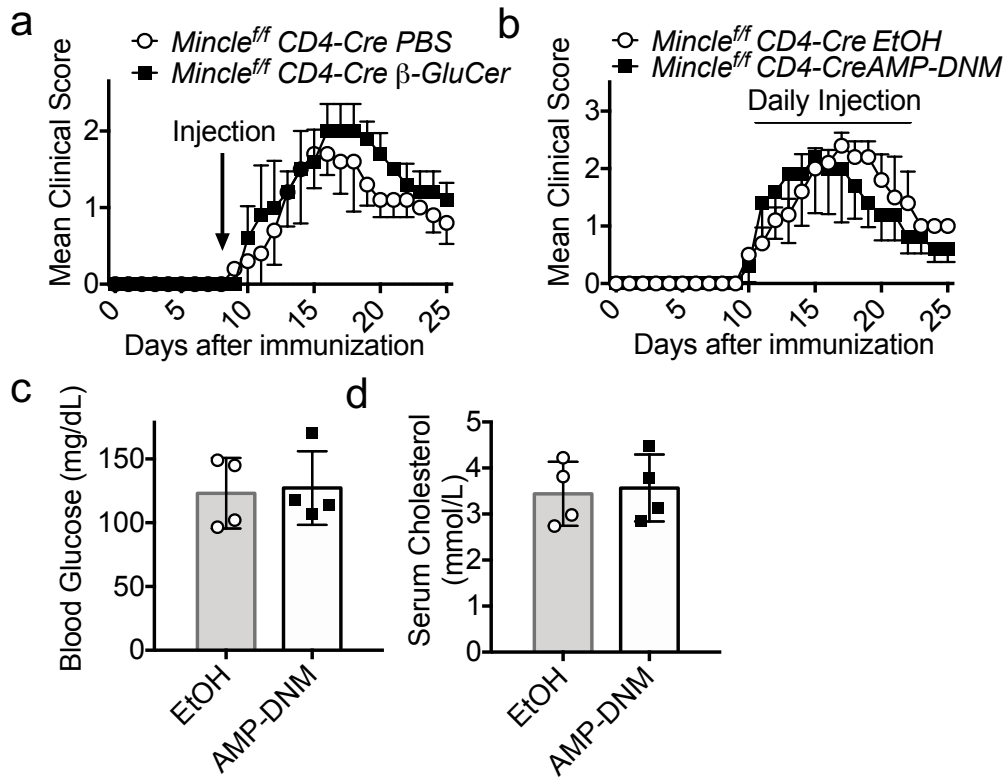

**Supplementary Fig 6.**  $\beta$ -Glucosylceramide or AMP-DNM administration did not affect EAE in *Mincle<sup>ff</sup>CD4-Cre* Mice **(a)** EAE clinical scores of *Mincle<sup>ff</sup>CD4-Cre* mice treated with  $\beta$ -glucosylceramide (150 $\mu$ g/mice) or vehicle during EAE induction, n=5 mice. **(b)** EAE clinical scores of *Mincle<sup>ff</sup>CD4-Cre* mice intraperitoneally injected daily with AMP-DNM (1mg/kg) or ethanol dissolved in PBS at the onset of the EAE, n=5 mice. **(c-d)** Blood glucose and serum cholesterol concentration were measured from the EAE mice (**Fig. 5f**) that treated with AMP-DNM or vehicle, n=4 biological replicates. (Two sided student's t test, **c, d**). (Two-way ANOVA, **a, b**). Data are represented as mean  $\pm$  SD.

# Supplementary Fig 7 Flow cytometry gating strategy

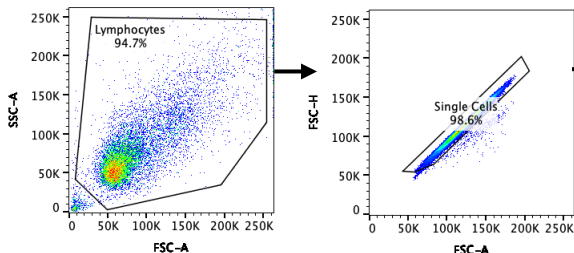

Further gated as figure 1d, 4a, 4b, 7a,7c  
Supplementary Figure 4a, 4b, 4c and supplementary Figure 5b, 5d

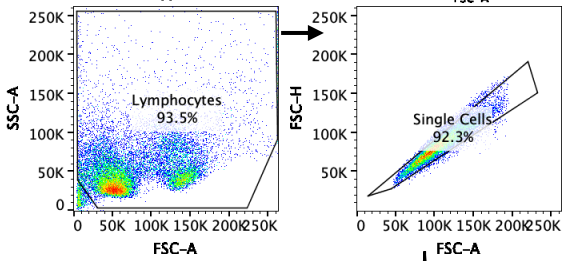

For figure 2d, 3f, 3h, 6d, 6h  
Supplementary figure 2f

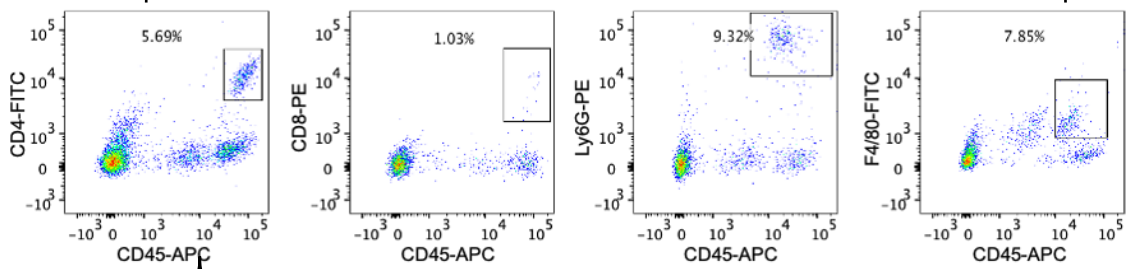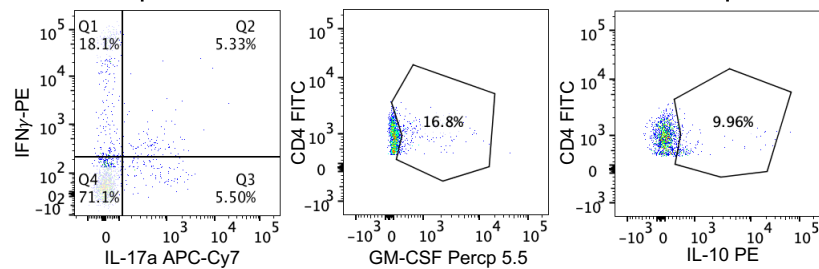

For figure 2g

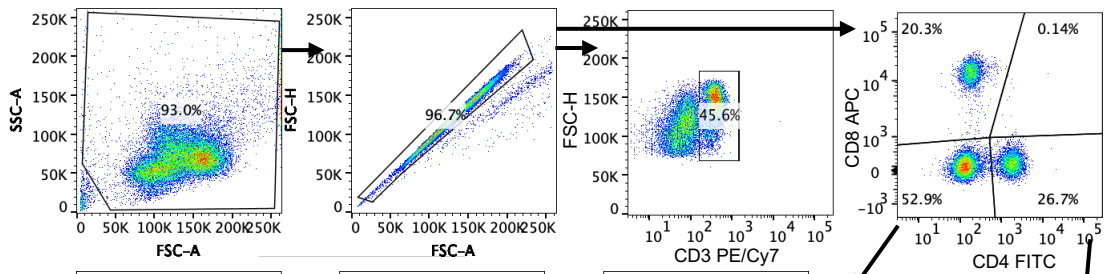

For supplementary figure 3b,c

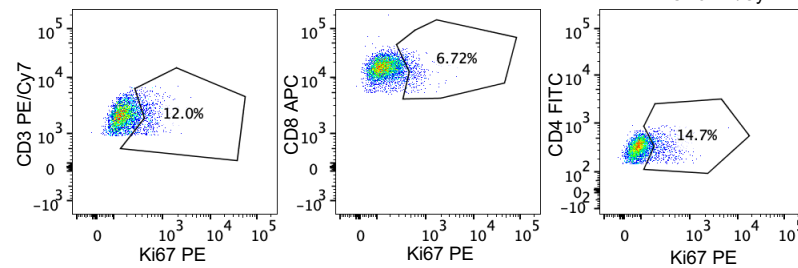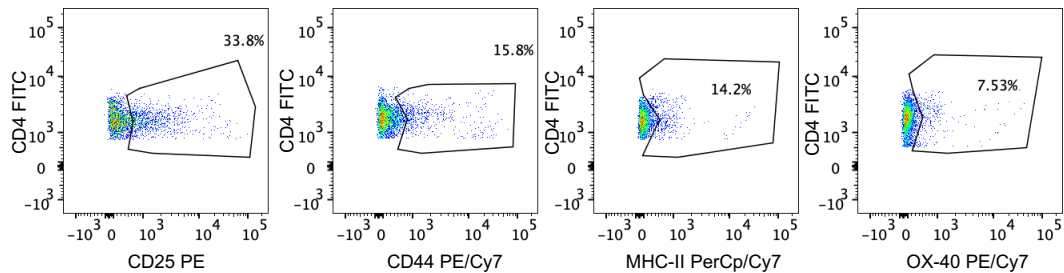

For supplementary figure 3d

Supplementary Table 1 Gene-specific primers used in qRT-PCR experiments.

| <b>Gene name</b> | <b>Forward primer 5'-&gt;3'</b> | <b>Reverse Primer 5'-&gt;3'</b> |
|------------------|---------------------------------|---------------------------------|
| Clec4e           | catcccaccacacagagaga            | ggtgatgaaacagccactga            |
| Clec7a           | catcgtctcaccgtattaatgcat        | cccagaacctatggccctt             |
| Clec4n           | ttcttacttctctgggtctttcg         | aacacaccgctcttctgga             |
| Clec4d           | gctggaagaatcccaaataga           | aaagcaagcactaaggaacgag          |
| Il17a            | gtccagggagagcttcatctg           | cttggcctcagtgtttggac            |
| Ifng             | ctcatggctgtttctggctg            | ccttttgccagtctctccag            |
| Tnf              | ccaccacgctcttctgtcta            | gatctgagtgtgagggctctgg          |
| Csf2             | ctaacaatgtgtgcagaccgg           | gtctggtagtagctggctgtc           |
| Ccl20            | cacaagacagatggccgatg            | ccctttcaccagttctgc              |
| Cxcl1            | ccagagcttgaagggtttgc            | tgaaccaagggagcttcagg            |
| Cxcl9            | aaacctgcctagatccggac            | cgactttgggggtgtttggg            |
| Mmp9             | cgacatagacggcatccagt            | gataggccgtgggaggtatag           |
| Il1b             | ccatcctctgtgactcatggg           | tcagctcatatgggtccgac            |
| Il18             | gccgacttcaactgtacaacc           | gtctggtctggggttcactg            |
| Nlrp3            | ggatatctctcccgatctcc            | gagggtccacactctcacctag          |
| Il1r1            | cccgaggtccagtggtataag           | cttcagccacattctcacc             |
